# Supplementary material for: Enantioselective organocatalytic oxyamination of unprotected 3-substituted oxindoles
Source: Royal Society of Chemistry journal article supplement (doi:10.1039/c1ob06503c), 2011-10-06
Supplement: c1ob06503c.pdf [file c1ob06503c.pdf]

## Enantioselective Organocatalytic Oxyamination of Unprotected 3-Substituted Oxindoles

Xavier Companyó, Guillem Valero, Oriol Pineda, Teresa Calvet, Mercè Font-Bardía, Albert Moyano, Ramon Rios

Supporting Information: Details on the theoretical calculation of the ECD spectrum of compound (*S*)-**3a**.

Copies of the  $^1\text{H}$  and  $^{13}\text{C}$  NMR spectra, and HPLC traces of compounds **3a-3i**. (TUC = Takemoto's thiourea catalyst **IX**)

### Theoretical determination of the ECD spectrum of compound (*S*)-**3a**.

In the first place, we set out to examine the conformational preferences of this compound. Since the X-ray diffraction structure of enantiopure **3a** had shown the presence, in the solid state, of hydrogen bonding between the hydroxylamine moiety and the oxindole carbonyl, we modeled and optimized a conformer having an intramolecular hydrogen bond (that will subsequently be referred to as conformer A), using DFT<sup>[1]</sup> at the B3LYP/6-31G(d)<sup>[2]</sup> level (Figure SI-1).

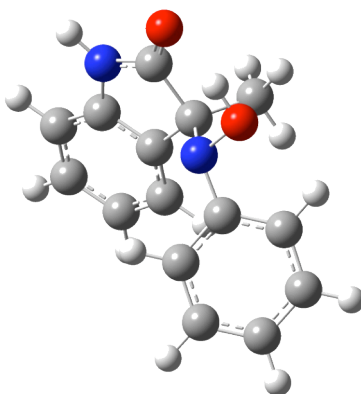

**Figure SI-1.** Conformer A (with intramolecular hydrogen bonding) of (*S*)-**3a**, calculated at the B3LYP/6-31G(d) level.

We decided next to explore the conformational space of **3a** at the same computational level. A systematic search, starting from conformer A, revealed the existence of two other stable conformers, B and C, without hydrogen bonding between the hydroxylamino and the carboxamide moieties (Figures SI-2 and SI-3, respectively).

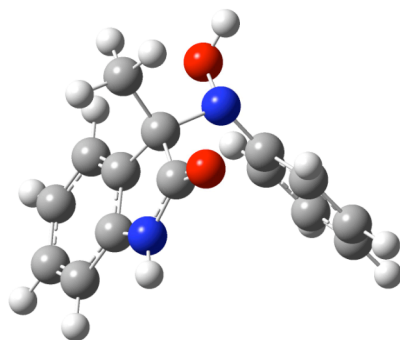

**Figure SI-2.** Conformer B of (*S*)-**3a**, calculated at the B3LYP/6-31G(d) level.

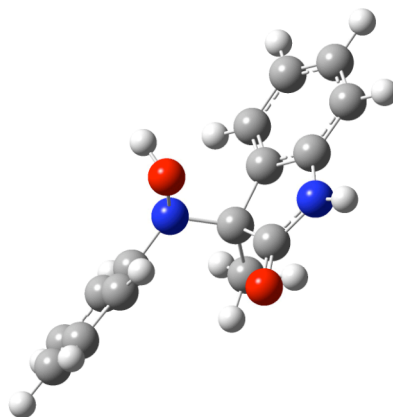

**Figure SI-3.** Conformer C of (*S*)-**3a**, calculated at the B3LYP/6-31G(d) level.

These three structures were then optimized in methanol solution by using a solvation simulation (Self-Consistent Reaction Field/Polarized Continuum Model, SCRF-PCM)<sup>[3]</sup> both at the B3LYP/6-31G(d) and at the B3LYP/6-31 + G(d) levels of theory. Since it has been shown that DFT functionals are not suitable for describing weak interactions between groups,<sup>[4]</sup> and that the use of Truhlar's parametrized M0X functionals or of MP2 methods gives more accurate results,<sup>[5]</sup> single-point calculations of the energy using these optimized geometries were next performed at the MP2/6-31G(d) and at the MP2/6-31 + G(d)

levels of theory, both in the gas phase and in methanol solution. After correction for ZPE, MP2 relative energies were compared, and conformer populations at 298 K were calculated assuming Maxwell-Boltzmann statistics. The results of these calculations are summarized in Table SI-1.

**Table SI-1.** Relative energies and populations (at 298 K) of conformers A, B and C of compound **3a**, calculated at different levels of theory.

| Entry | Calculation level                    | Conformation | Rel. Energy (kcal mol <sup>-1</sup> ) | Population   |
|-------|--------------------------------------|--------------|---------------------------------------|--------------|
| 1     | MP2/6-31G(d)                         | A            | 0.60                                  | 25.9%        |
|       |                                      | B            | 0.00                                  | 65.5%        |
|       |                                      | C            | 1.30                                  | 8.6%         |
| 2     | MP2/6-31+G(d)                        | A            | 1.96                                  | 4.4%         |
|       |                                      | B            | 0.00                                  | 92.6%        |
|       |                                      | C            | 2.21                                  | 3.0%         |
| 3     | MP2/6-31G(d)–<br>CH <sub>3</sub> OH  | A            | 3.34                                  | 0.5%         |
|       |                                      | B            | 0.00                                  | 85.2%        |
|       |                                      | C            | 1.15                                  | 14.3%        |
| 4     | MP2/6-31+G(d)–<br>CH <sub>3</sub> OH | A            | 3.37                                  | 0.5%         |
|       |                                      | <b>B</b>     | <b>0.00</b>                           | <b>96.4%</b> |
|       |                                      | C            | 2.21                                  | 3.1%         |

In all instances conformation B was the more stable one, and its relative stability increased both with the introduction of diffuse functions (entry 2) and with the solvation simulation (entries 3 and 4). At the highest level of calculation (entry 4), the estimated population of conformer B is higher than 96%; moreover, the calculated geometry of B is very similar to that of enantiopure **3a** in the solid state (compare Figure SI-2 with Figure 3 of the article). This conformation was thus used in a time-dependent DFT calculation, at the B3LYP/6-311++G(d,p) level, to simulate the ECD.

[1] Gaussian 0.9, Revision A 02, M. J. Frisch *et al.*, Gaussian, Inc., Wallingford CT, **2009**.

- [2] a) A. D. Becke, *J. Chem. Phys.* 1993, **98**, 5648-5652; b) C. Lee, W. Yang and R. G. Parr, *Phys. Rev. B* 1988, **37**, 785-790; c) P. J. Stephens, F. J. Devlin, C. F. Chabalowski, M. J. Frisch, *J. Phys. Chem.* 1994, **98**, 11623-11627.
- [3] a) S. Miertus and J. Tomasi, *Chem. Phys.* 1982, **65**, 239-245; b) S. Miertus, E. Scrocco and J. Tomasi, *Chem. Phys.* 1981, **55**, 117-129.
- [4] a) Y. Zhao and D. G. Truhlar, *J. Chem. Theory Comput.* 2007, **3**, 289-300. b) Y. Zhao and D. G. Truhlar, *J. Chem. Theory Comput.* 2005, **1**, 415-432. c) Y. Zhao and D. G. Truhlar, *Phys. Chem. Chem. Phys.* 2005, **7**, 2701-2705.
- [5] a) J. Zheng, Y. Zhao and D. G. Truhlar, *J. Chem. Theory Comput.* 2007, **3**, 569-582. b) P. H.-Y. Cheong, C. Y. Legault, J. M. Um, N. Çelebi-Ölçüm and K. N. Houk, *Chem. Rev.* 2011, **111**, 5042-5137.

**3a**

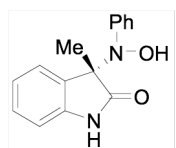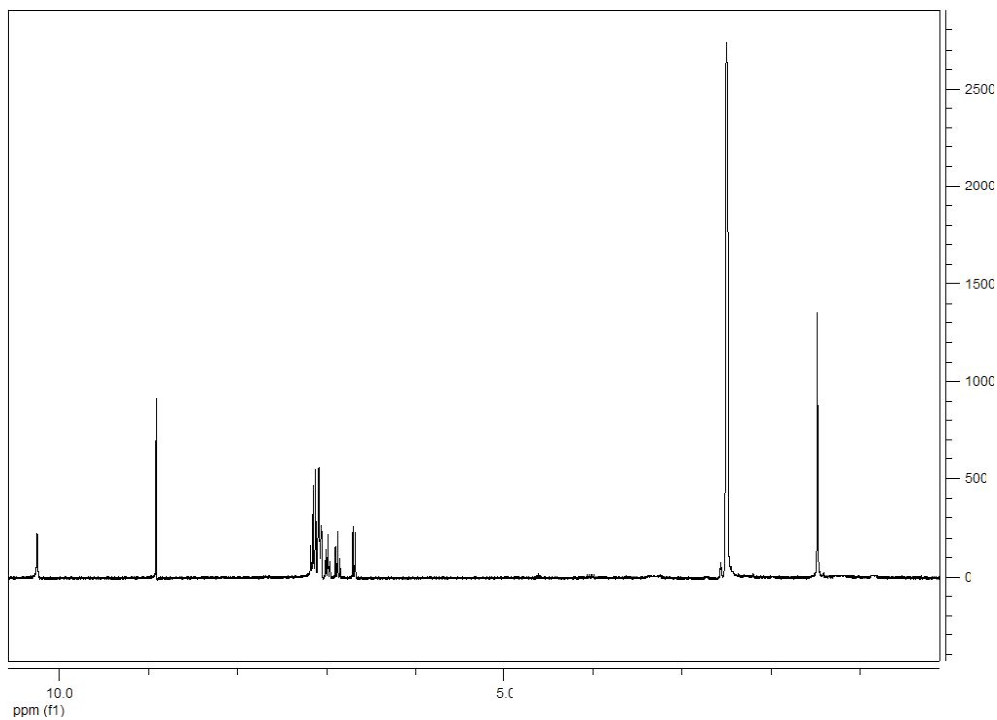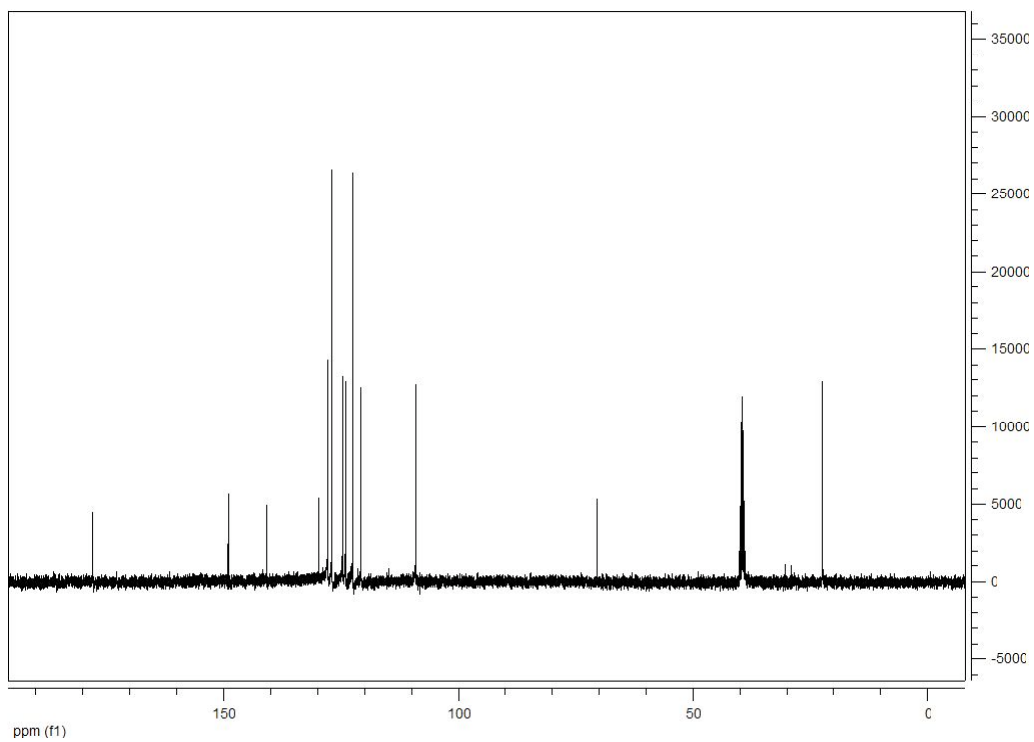

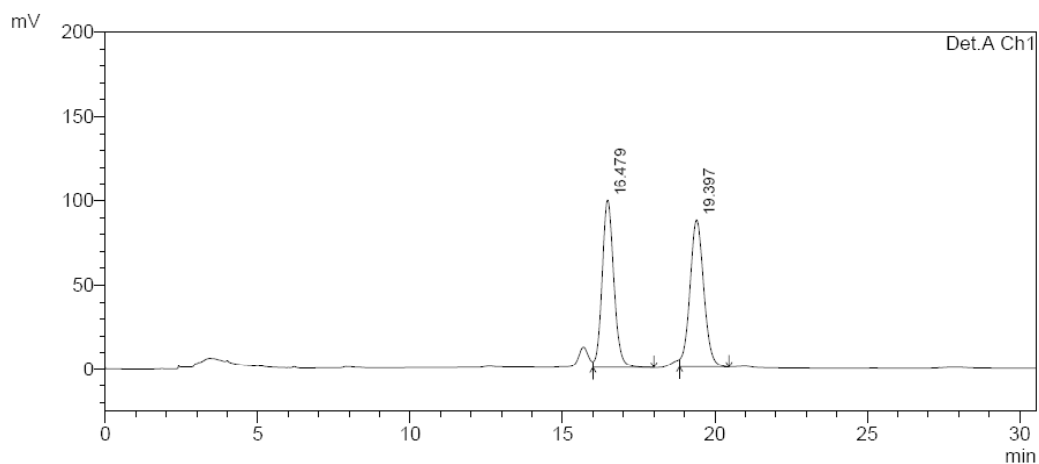

1 Det.A Ch1/254nm

PeakTable

Detector A Ch1 254nm

| Peak# | Ret. Time | Area    | Height | Area %  | Height % |
|-------|-----------|---------|--------|---------|----------|
| 1     | 16.479    | 2661215 | 99220  | 49.107  | 53.270   |
| 2     | 19.397    | 2758051 | 87037  | 50.893  | 46.730   |
| Total |           | 5419265 | 186258 | 100.000 | 100.000  |

(*S,S*)-TUC

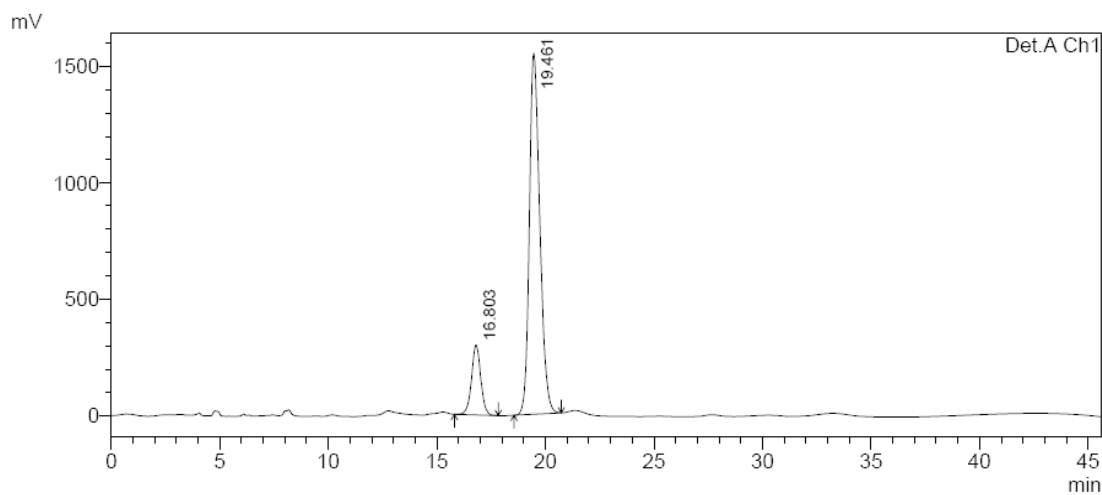

1 Det.A Ch1/254nm

PeakTable

Detector A Ch1 254nm

| Peak# | Ret. Time | Area     | Height  | Area %  | Height % |
|-------|-----------|----------|---------|---------|----------|
| 1     | 16.803    | 8945572  | 303257  | 14.718  | 16.379   |
| 2     | 19.461    | 51836046 | 1548277 | 85.282  | 83.621   |
| Total |           | 60781619 | 1851534 | 100.000 | 100.000  |

(*S,S*)-TUC (filtration)

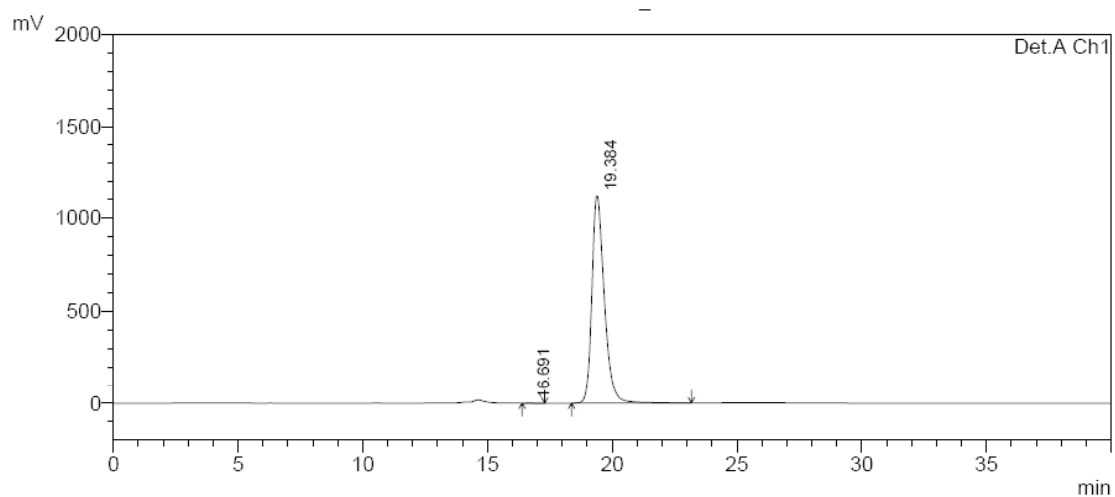

1 Det.A Ch1/254nm

PeakTable

Detector A Ch1 254nm

| Peak# | Ret. Time | Area     | Height  | Area %  | Height % |
|-------|-----------|----------|---------|---------|----------|
| 1     | 16.691    | 2693     | 115     | 0.007   | 0.010    |
| 2     | 19.384    | 38980607 | 1123195 | 99.993  | 99.990   |
| Total |           | 38983300 | 1123310 | 100.000 | 100.000  |

(*R,R*)-TUC

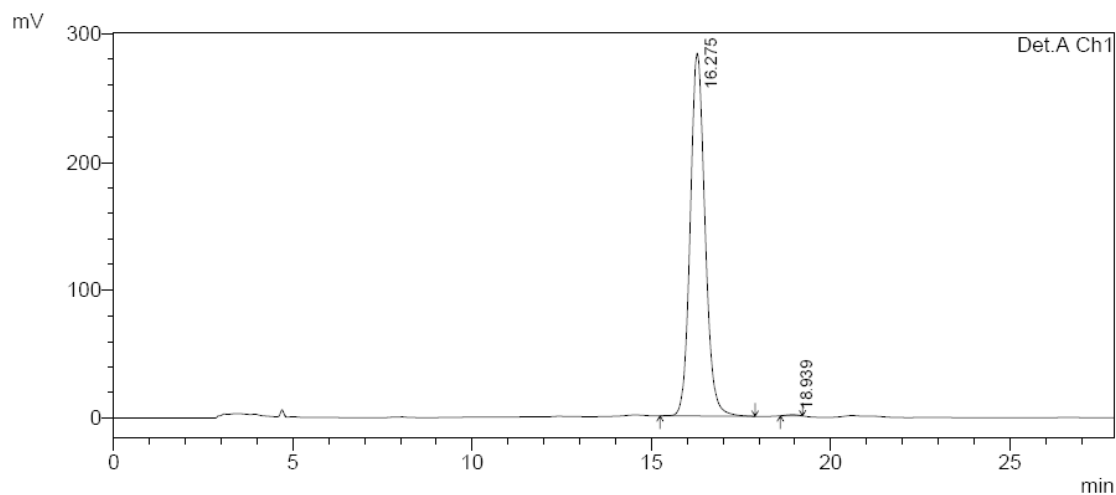

1 Det.A Ch1/254nm

PeakTable

Detector A Ch1 254nm

| Peak# | Ret. Time | Area    | Height | Area %  | Height % |
|-------|-----------|---------|--------|---------|----------|
| 1     | 16.275    | 8153975 | 283458 | 99.752  | 99.670   |
| 2     | 18.939    | 20312   | 939    | 0.248   | 0.330    |
| Total |           | 8174287 | 284397 | 100.000 | 100.000  |

**3b**

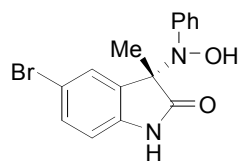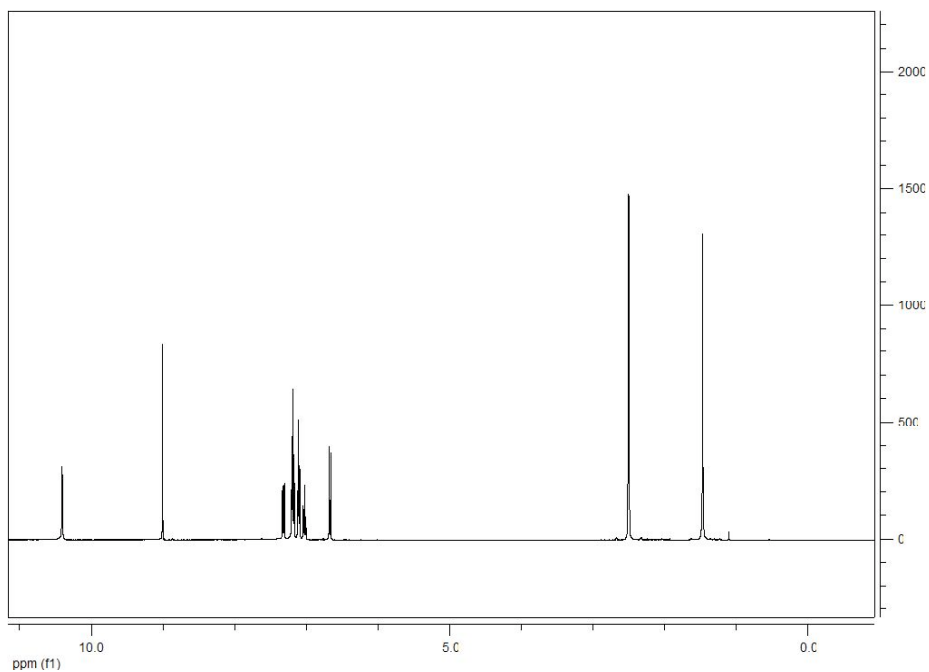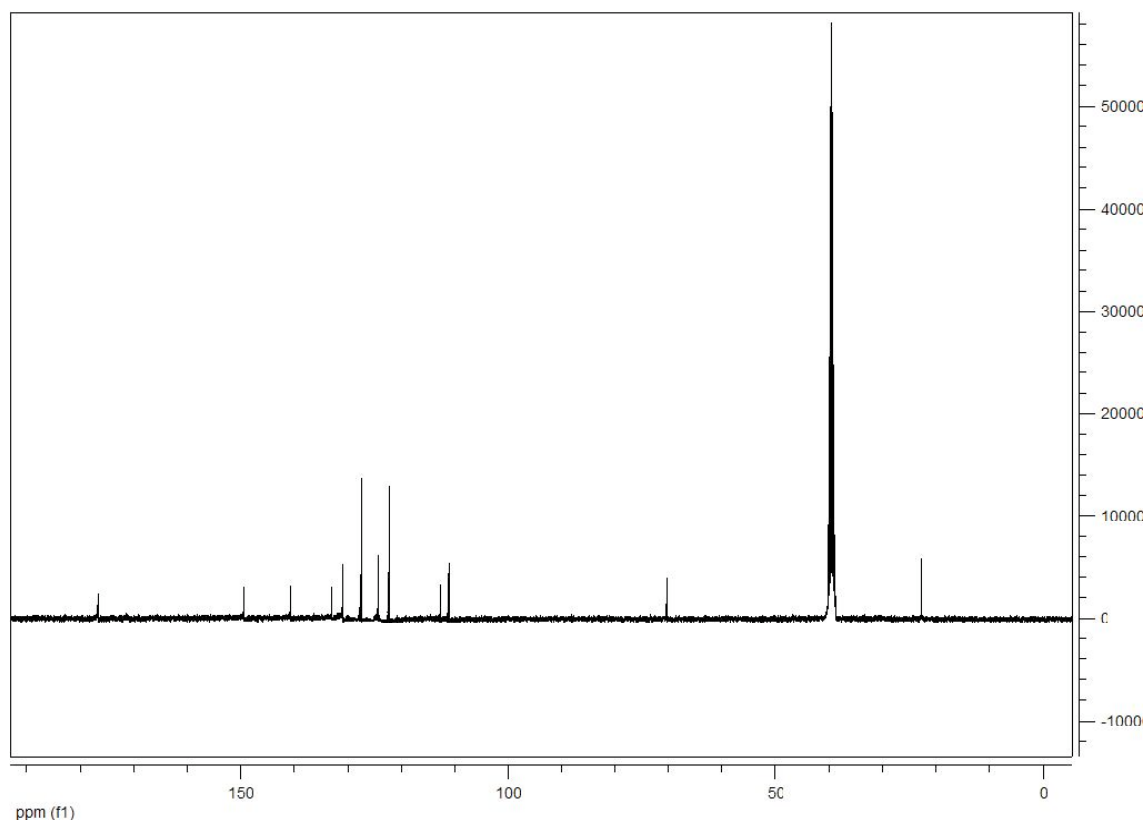



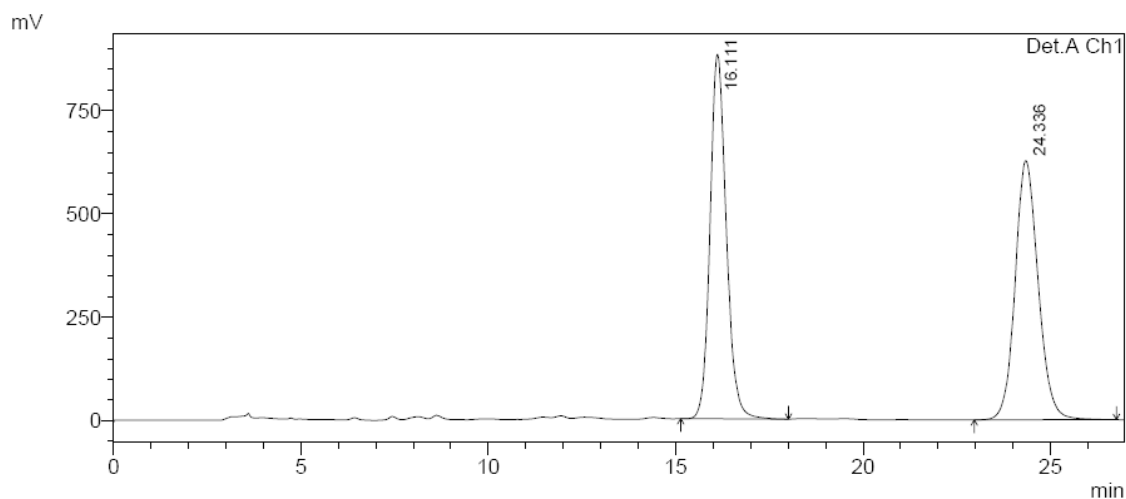

1 Det.A Ch1/254nm

PeakTable

Detector A Ch1 254nm

| Peak# | Ret. Time | Area     | Height  | Area %  | Height % |
|-------|-----------|----------|---------|---------|----------|
| 1     | 16.111    | 26655036 | 881970  | 49.720  | 58.361   |
| 2     | 24.336    | 26955521 | 629261  | 50.280  | 41.639   |
| Total |           | 53610556 | 1511231 | 100.000 | 100.000  |

(S,S)-TUC

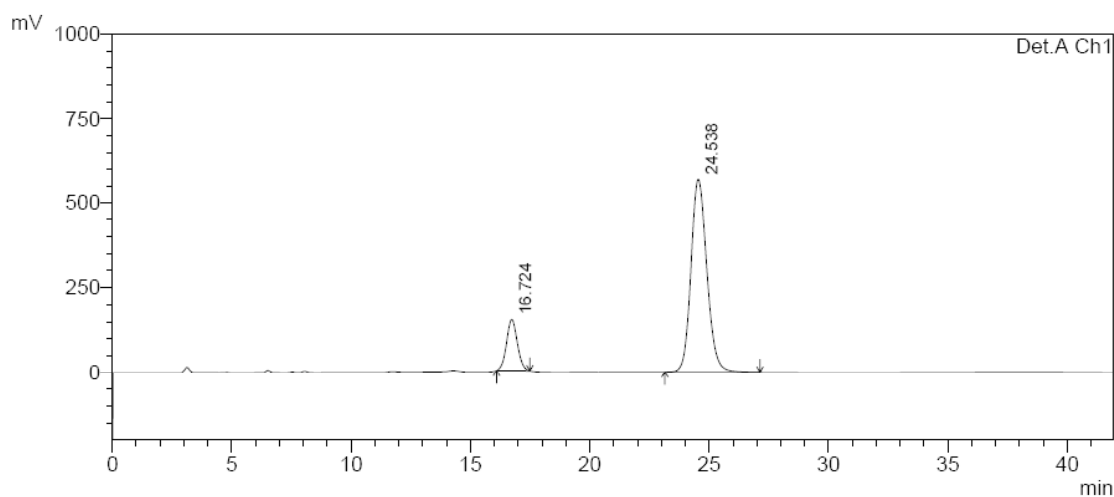

1 Det.A Ch1/220nm

PeakTable

Detector A Ch1 220nm

| Peak# | Ret. Time | Area     | Height | Area %  | Height % |
|-------|-----------|----------|--------|---------|----------|
| 1     | 16.724    | 4769431  | 151255 | 15.329  | 20.964   |
| 2     | 24.538    | 26345238 | 570239 | 84.671  | 79.036   |
| Total |           | 31114669 | 721493 | 100.000 | 100.000  |

(*R,R*)-TUC

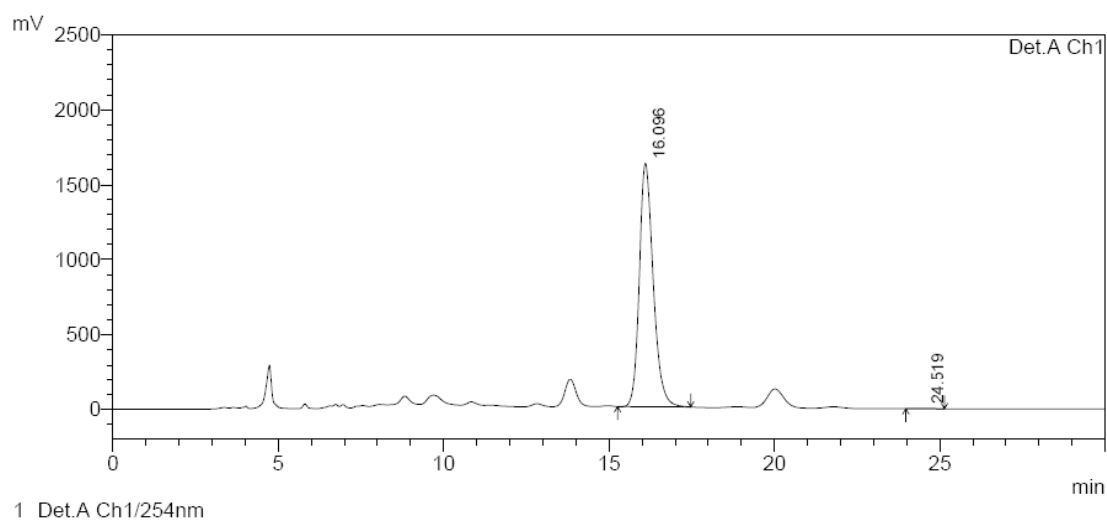

PeakTable

Detector A Ch1 254nm

| Peak# | Ret. Time | Area     | Height  | Area %  | Height % |
|-------|-----------|----------|---------|---------|----------|
| 1     | 16.096    | 47563082 | 1628410 | 99.931  | 99.942   |
| 2     | 24.519    | 32851    | 953     | 0.069   | 0.058    |
| Total |           | 47595934 | 1629362 | 100.000 | 100.000  |

**3c**

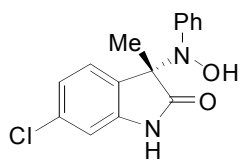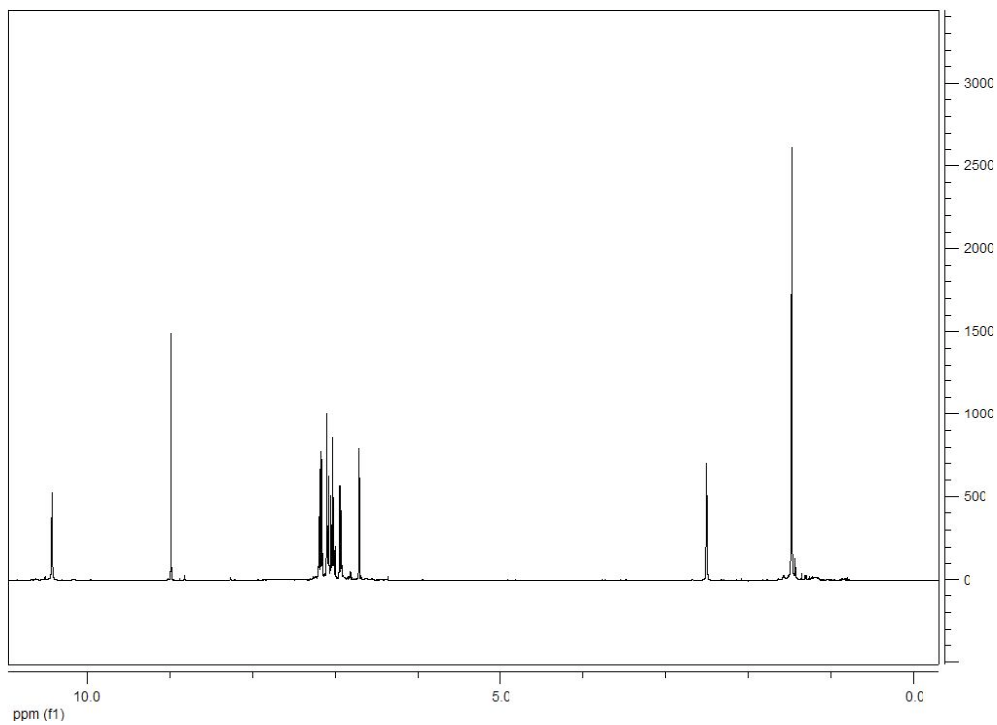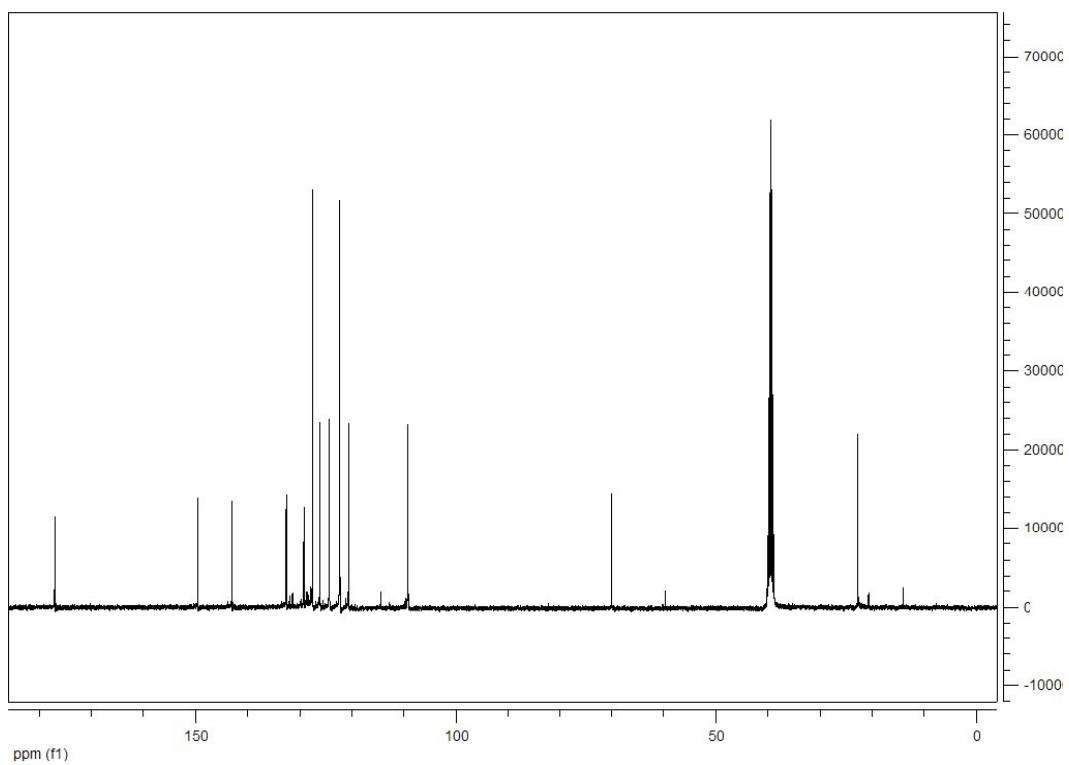

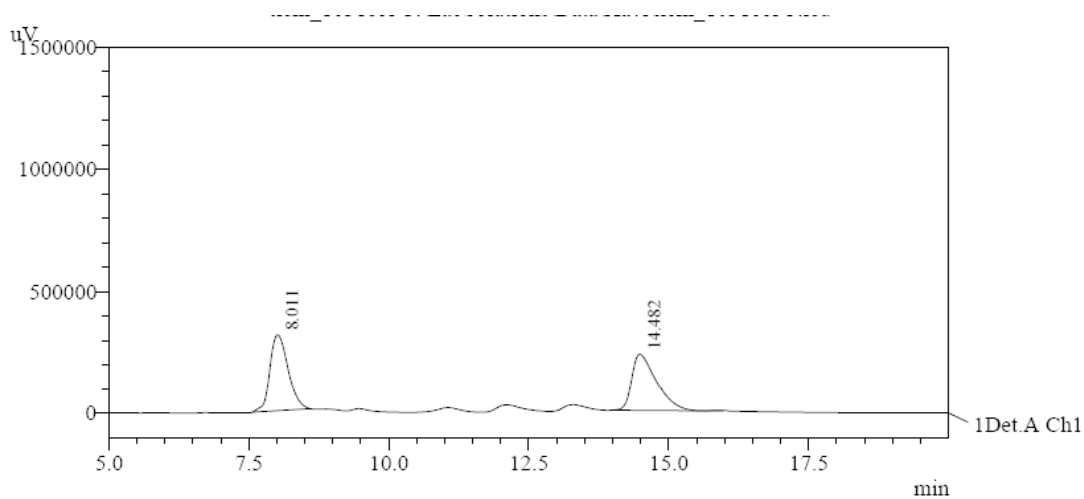

1 Det.A Ch1 / 254nm

PeakTable

Detector A Ch1 254nm

| Peak# | Ret. Time | Area     | Height | Area %  | Height % |
|-------|-----------|----------|--------|---------|----------|
| 1     | 8.011     | 7133870  | 314058 | 49.844  | 57.388   |
| 2     | 14.482    | 7178391  | 233195 | 50.156  | 42.612   |
| Total |           | 14312262 | 547253 | 100.000 | 100.000  |

(S,S)-TUC

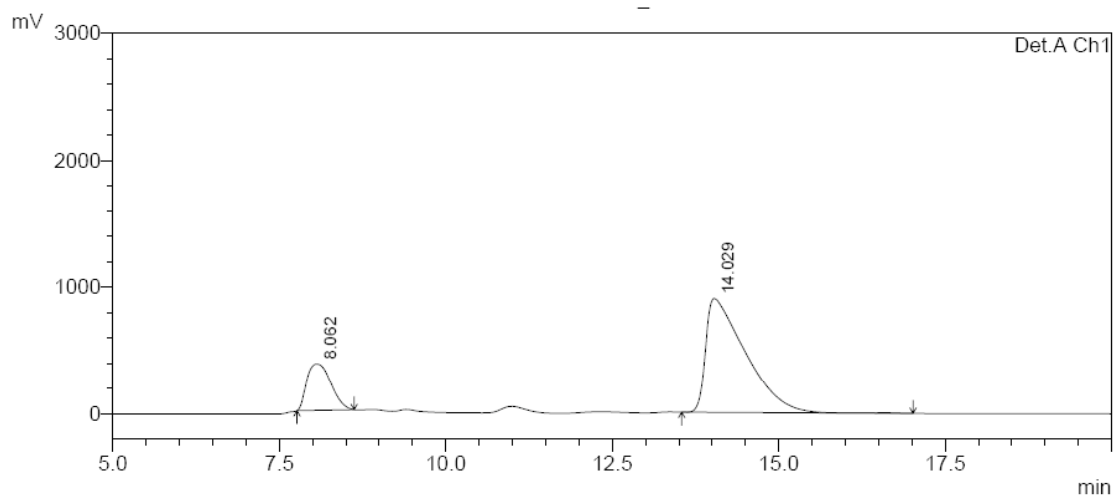

1 Det.A Ch1/254nm

PeakTable

Detector A Ch1 254nm

| Peak# | Ret. Time | Area     | Height  | Area %  | Height % |
|-------|-----------|----------|---------|---------|----------|
| 1     | 8.062     | 9313717  | 369773  | 19.862  | 29.102   |
| 2     | 14.029    | 37577301 | 900826  | 80.138  | 70.898   |
| Total |           | 46891019 | 1270599 | 100.000 | 100.000  |

**3d**

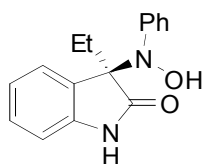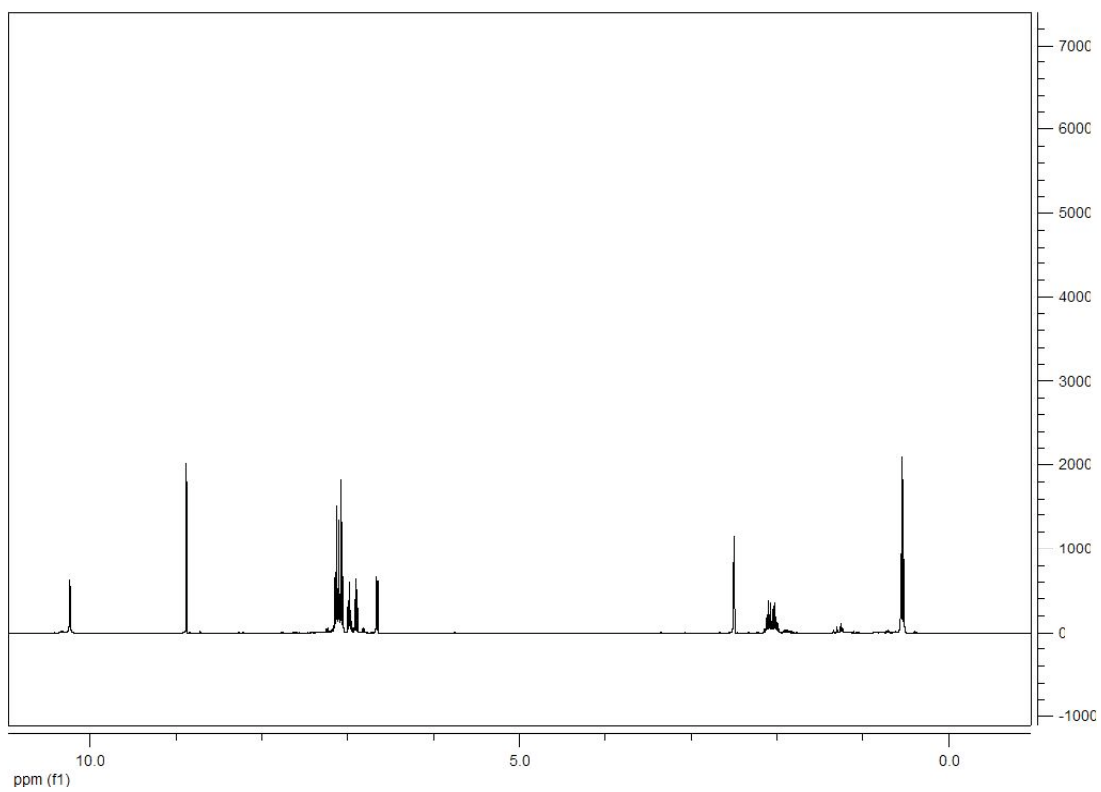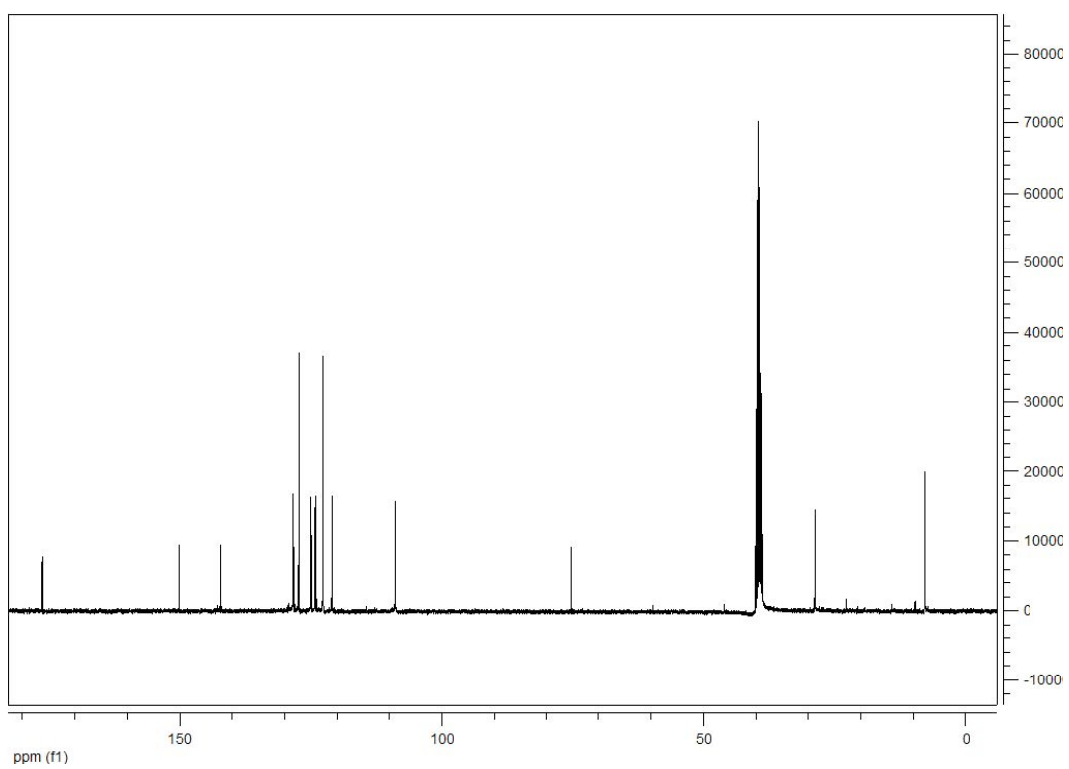

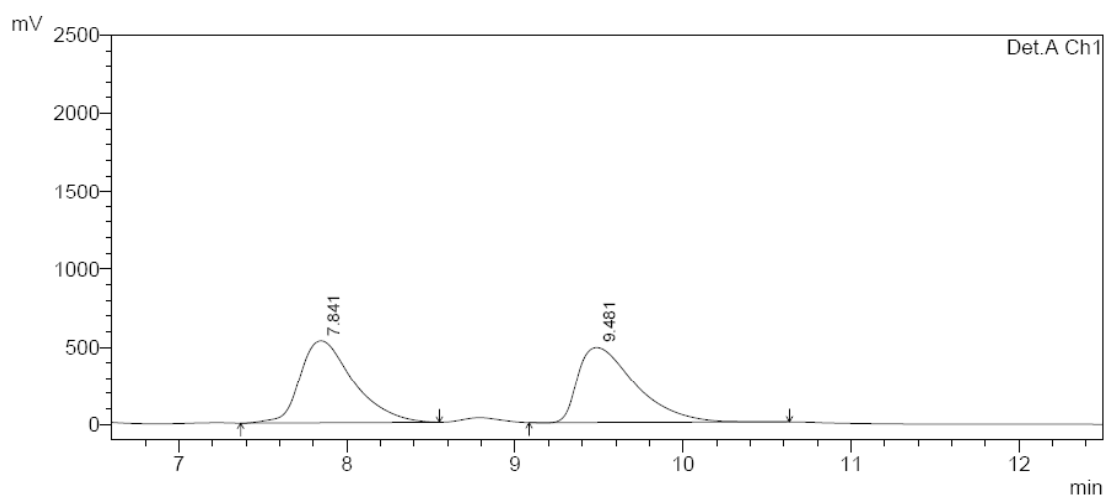

1 Det.A Ch1/254nm

PeakTable

Detector A Ch1 254nm

| Peak# | Ret. Time | Area     | Height  | Area %  | Height % |
|-------|-----------|----------|---------|---------|----------|
| 1     | 7.841     | 11730730 | 531375  | 50.387  | 52.247   |
| 2     | 9.481     | 11550519 | 485666  | 49.613  | 47.753   |
| Total |           | 23281249 | 1017041 | 100.000 | 100.000  |

### (R,R)-TUC

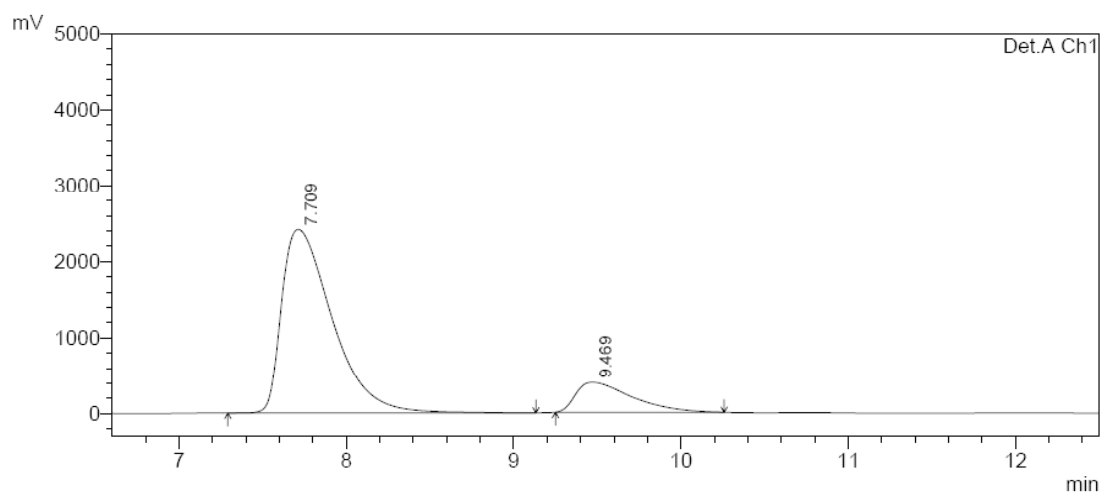

1 Det.A Ch1/254nm

PeakTable

Detector A Ch1 254nm

| Peak# | Ret. Time | Area     | Height  | Area %  | Height % |
|-------|-----------|----------|---------|---------|----------|
| 1     | 7.709     | 50892059 | 2412581 | 84.700  | 85.916   |
| 2     | 9.469     | 9193341  | 395480  | 15.300  | 14.084   |
| Total |           | 60085401 | 2808061 | 100.000 | 100.000  |

3e

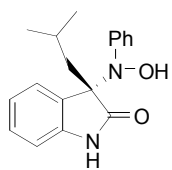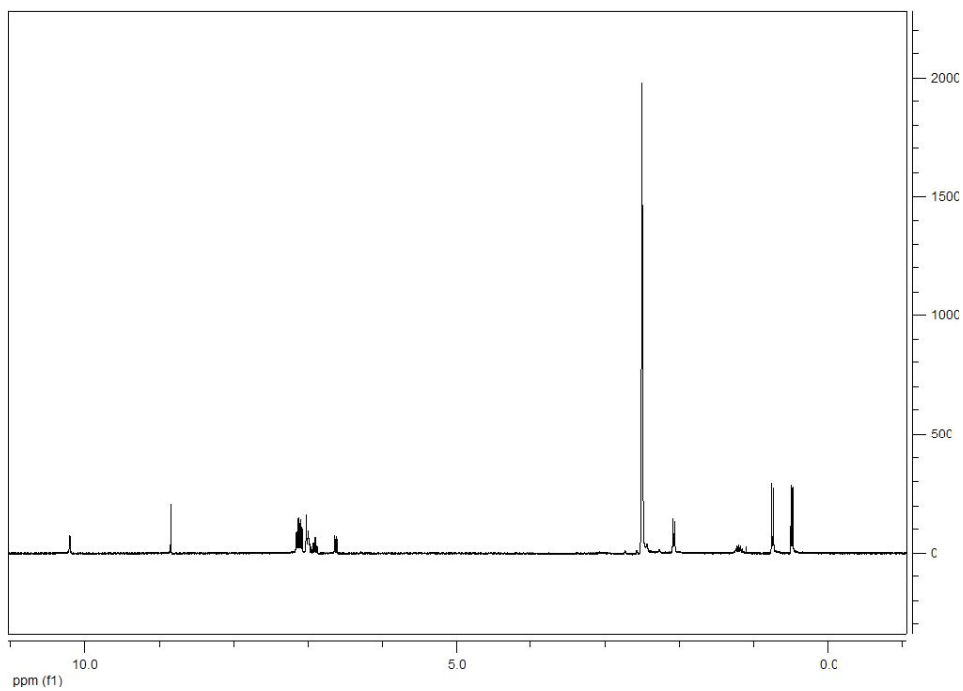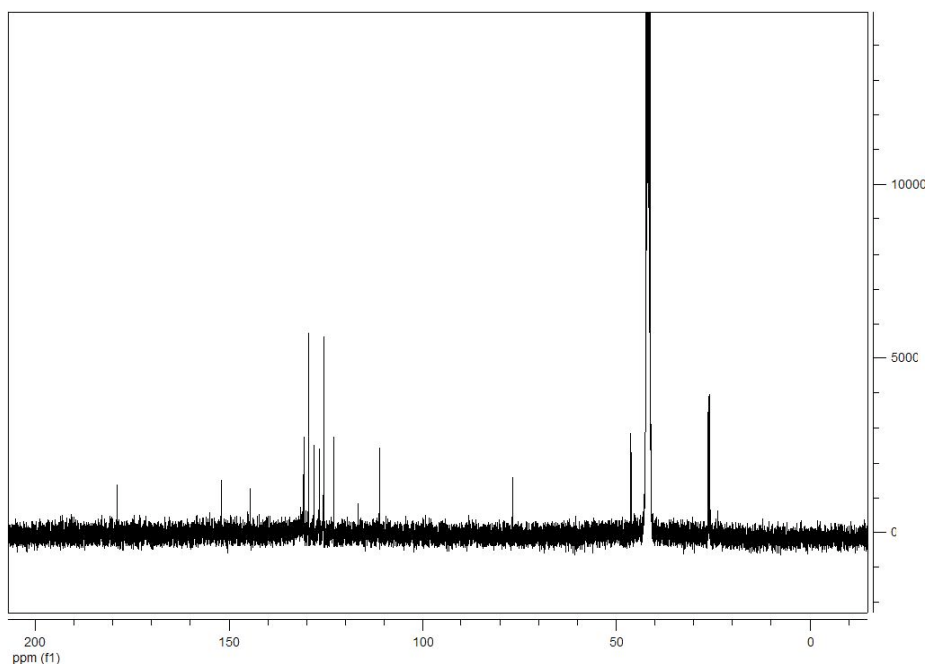

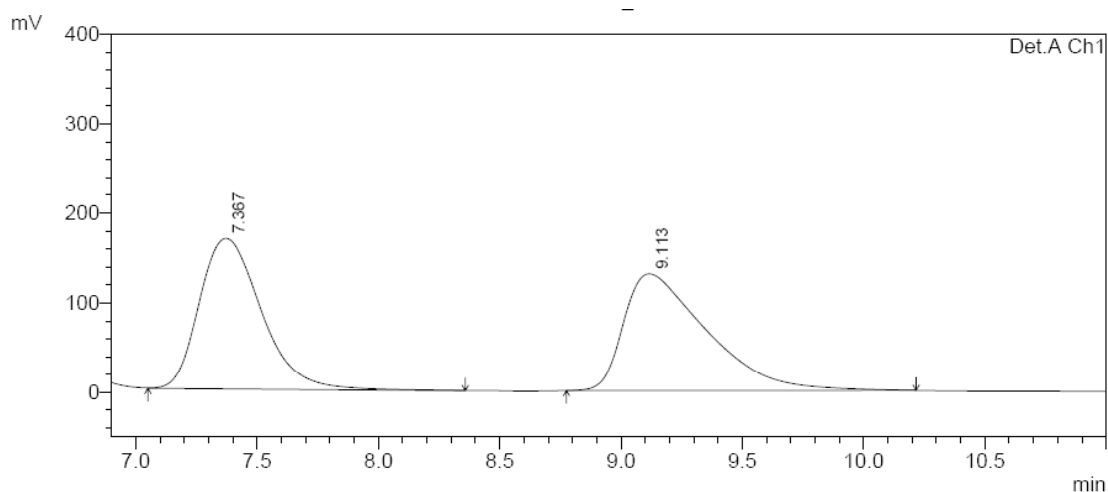

1 Det.A Ch1/254nm

PeakTable

| Peak# | Ret. Time | Area    | Area %  |
|-------|-----------|---------|---------|
| 1     | 7.367     | 2998187 | 49.131  |
| 2     | 9.113     | 3104306 | 50.869  |
| Total |           | 6102493 | 100.000 |

(S,S)-TUC

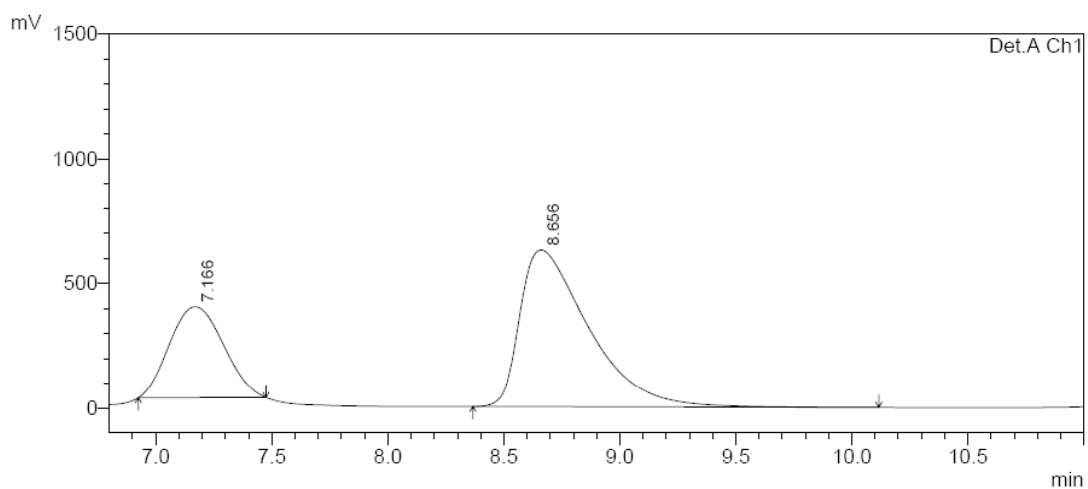

1 Det.A Ch1/220nm

PeakTable

| Peak# | Ret. Time | Area     | Height | Area %  | Height % |
|-------|-----------|----------|--------|---------|----------|
| 1     | 7.166     | 5925131  | 364725 | 31.318  | 36.774   |
| 2     | 8.656     | 12994079 | 627073 | 68.682  | 63.226   |
| Total |           | 18919210 | 991798 | 100.000 | 100.000  |



(*S,S*)-TUC (with filtration)

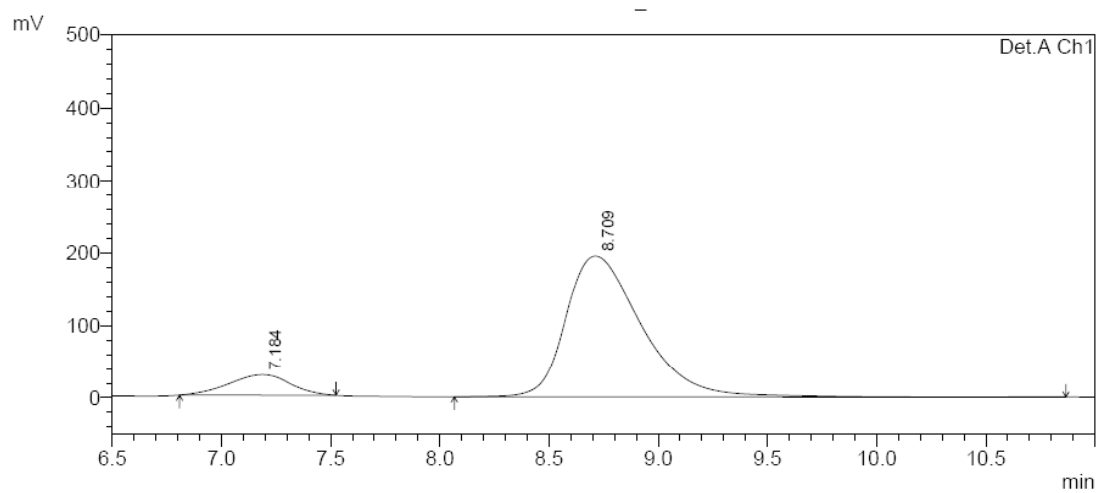

1 Det.A Ch1/254nm

PeakTable

Detector A Ch1 254nm

| Peak# | Ret. Time | Area    | Height | Area %  | Height % |
|-------|-----------|---------|--------|---------|----------|
| 1     | 7.184     | 548448  | 28240  | 10.484  | 12.667   |
| 2     | 8.709     | 4682807 | 194693 | 89.516  | 87.333   |
| Total |           | 5231255 | 222932 | 100.000 | 100.000  |

3f

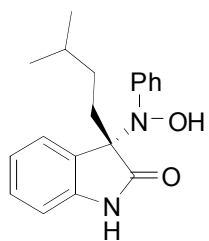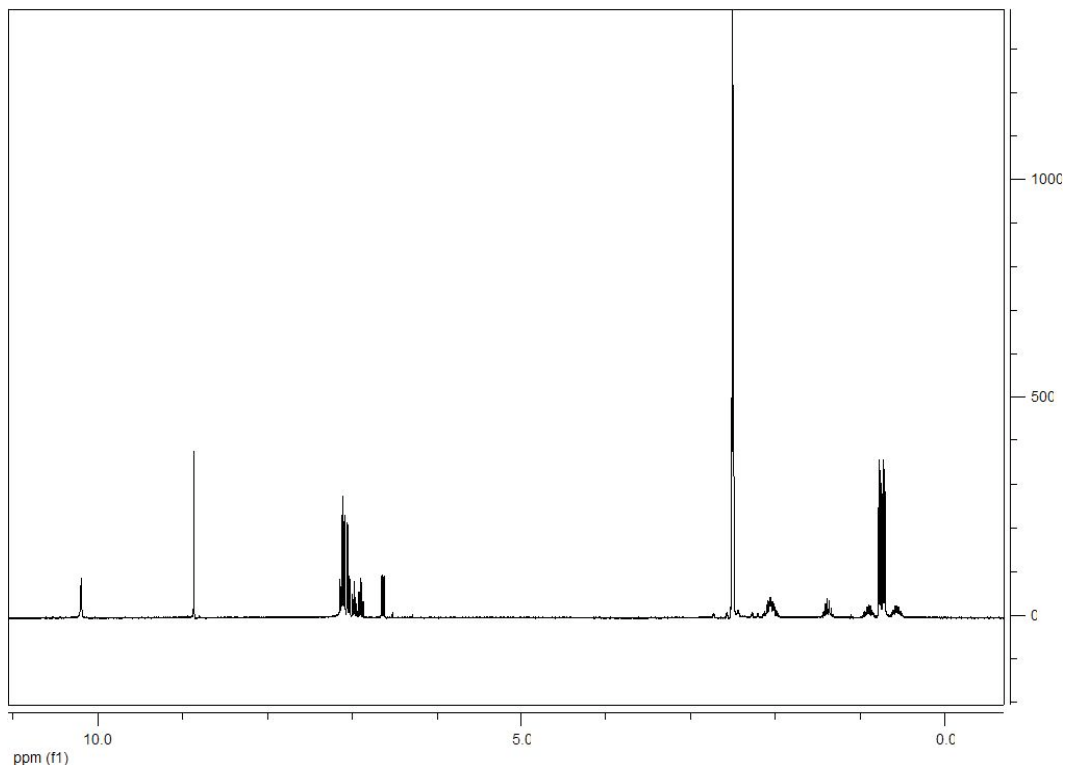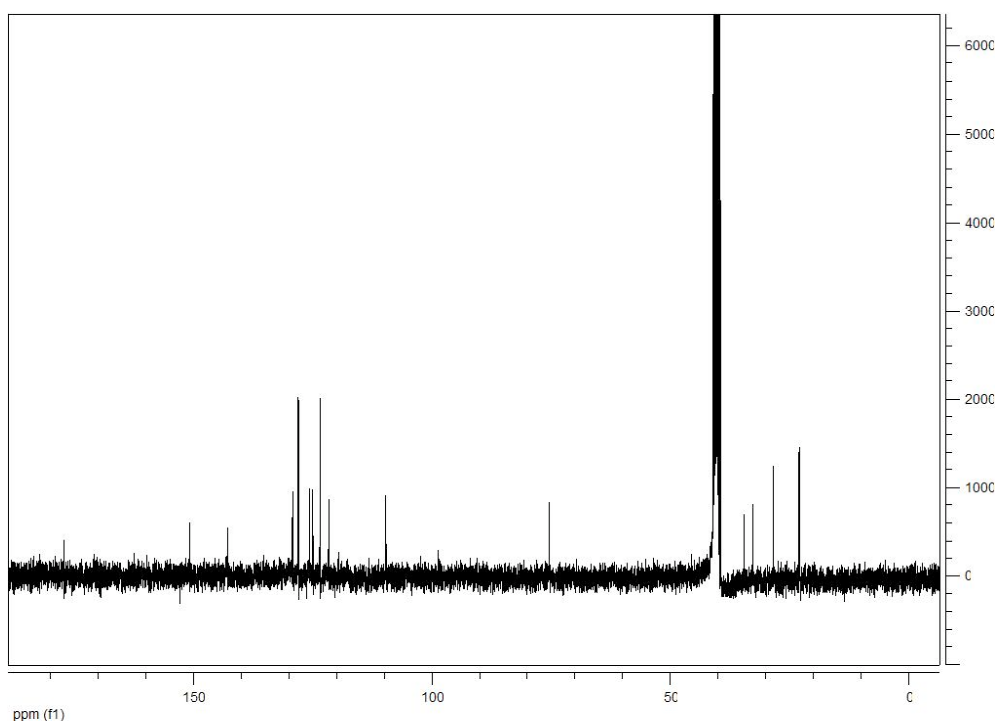

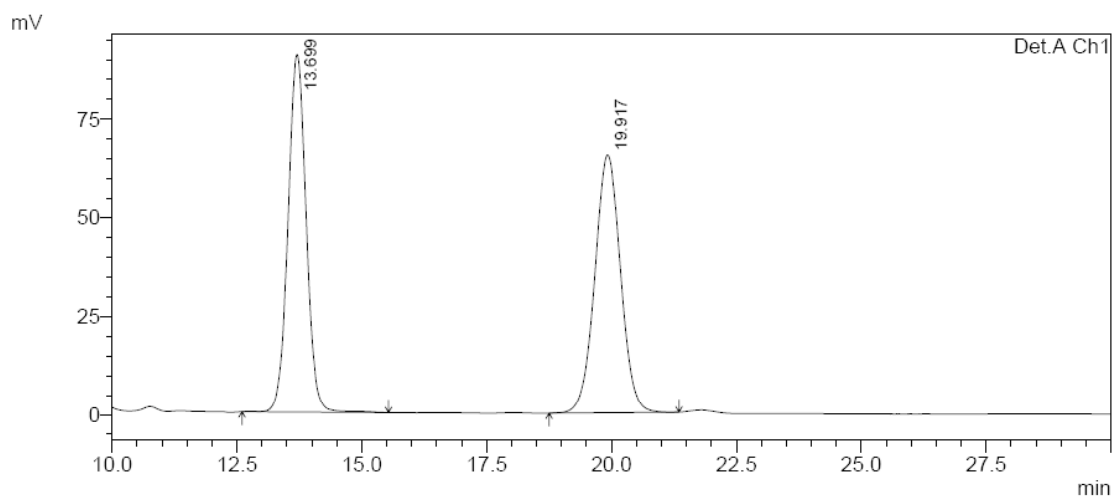

1 Det.A Ch1/254nm

PeakTable

Detector A Ch1 254nm

| Peak# | Ret. Time | Area    | Height | Area %  | Height % |
|-------|-----------|---------|--------|---------|----------|
| 1     | 13.699    | 2304091 | 90701  | 49.497  | 58.036   |
| 2     | 19.917    | 2350912 | 65582  | 50.503  | 41.964   |
| Total |           | 4655003 | 156283 | 100.000 | 100.000  |

(S,S)-TUC

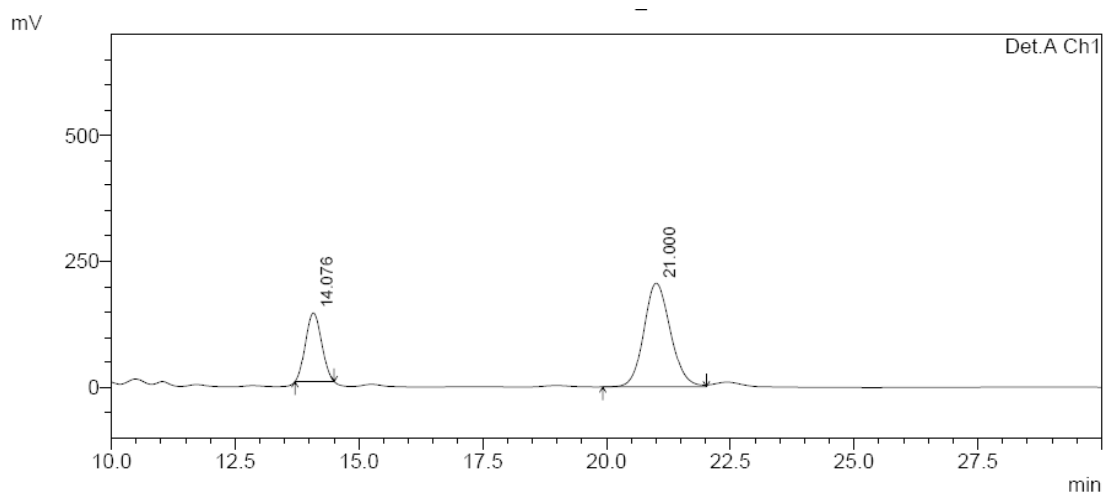

1 Det.A Ch1/254nm

PeakTable

Detector A Ch1 254nm

| Peak# | Ret. Time | Area     | Height | Area %  | Height % |
|-------|-----------|----------|--------|---------|----------|
| 1     | 14.076    | 3093534  | 137240 | 28.530  | 39.941   |
| 2     | 21.000    | 7749649  | 206367 | 71.470  | 60.059   |
| Total |           | 10843183 | 343607 | 100.000 | 100.000  |

(*R,R*)-TUC

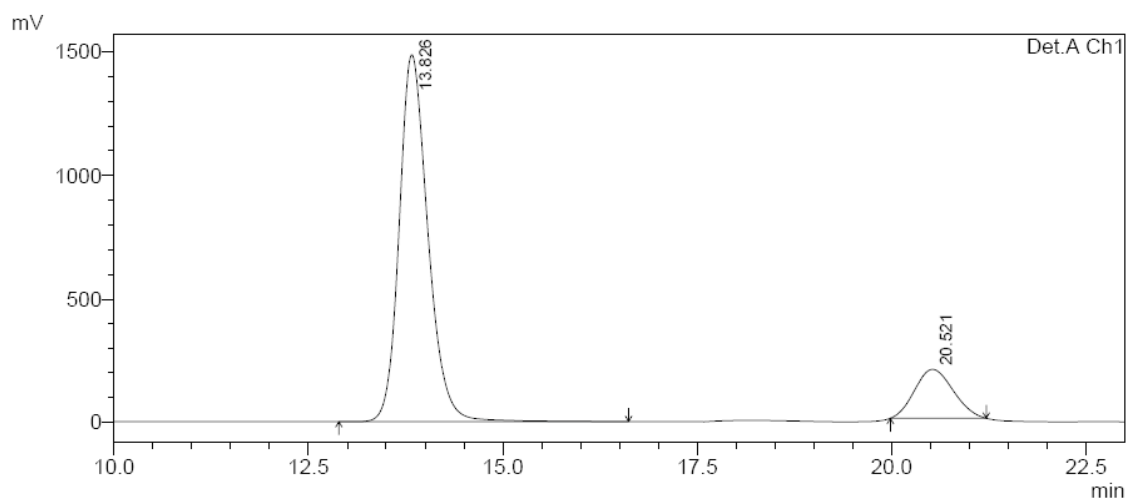

1 Det.A Ch1/254nm

PeakTable

Detector A Ch1 254nm

| Peak# | Ret. Time | Area     | Height  | Area %  | Height % |
|-------|-----------|----------|---------|---------|----------|
| 1     | 13.826    | 38229535 | 1485979 | 84.882  | 88.272   |
| 2     | 20.521    | 6808735  | 197434  | 15.118  | 11.728   |
| Total |           | 45038270 | 1683413 | 100.000 | 100.000  |

3g

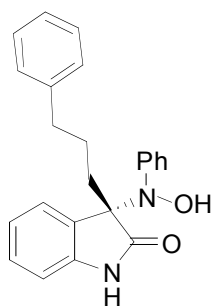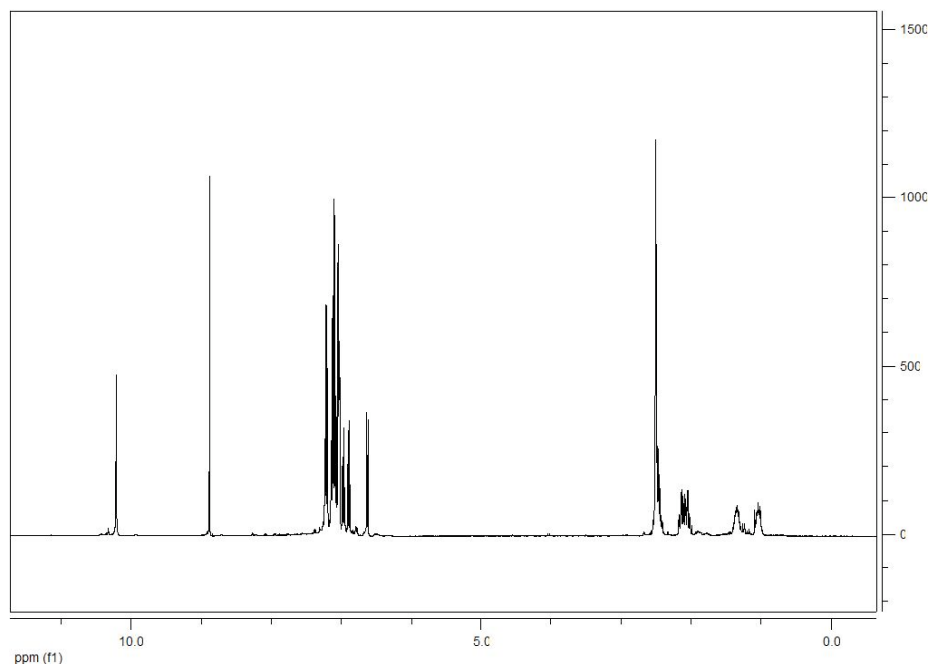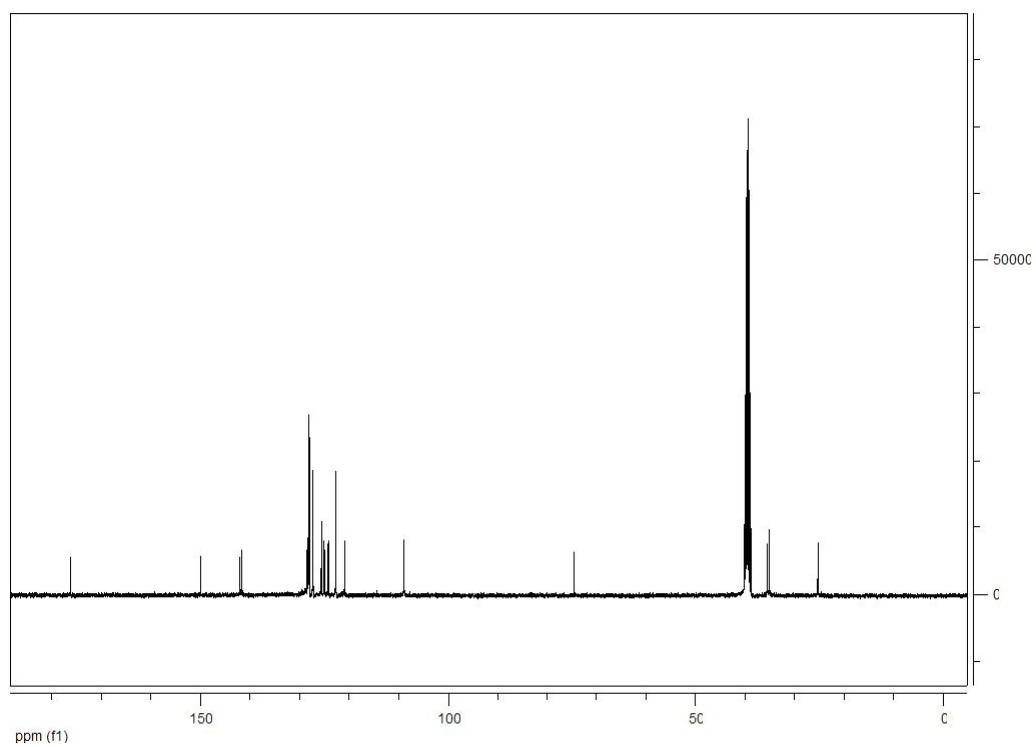

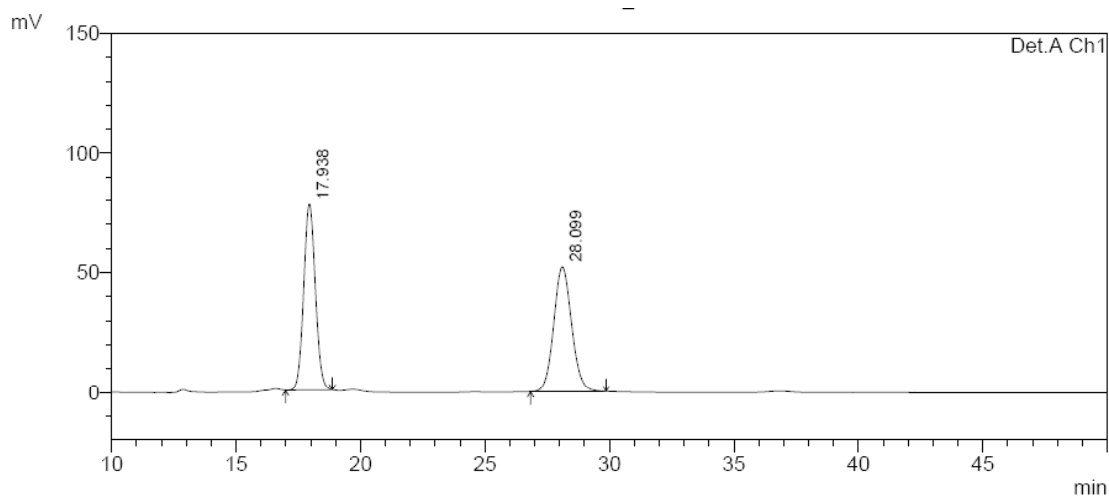

1 Det.A Ch1/254nm

PeakTable

Detector A Ch1 254nm

| Peak# | Ret. Time | Area    | Height | Area %  | Height % |
|-------|-----------|---------|--------|---------|----------|
| 1     | 17.938    | 2532788 | 77527  | 49.143  | 59.837   |
| 2     | 28.099    | 2621152 | 52037  | 50.857  | 40.163   |
| Total |           | 5153939 | 129564 | 100.000 | 100.000  |

(S,S)-TUC

C:\LabSolutions\Data\Xavi\xcm\_1024col-1.lcd

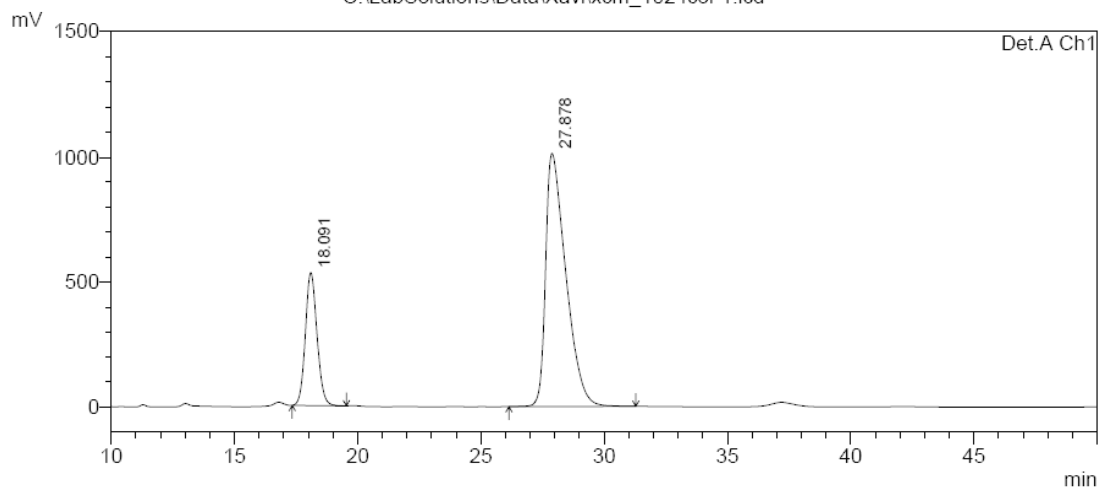

1 Det.A Ch1/230nm

PeakTable

Detector A Ch1 230nm

| Peak# | Ret. Time | Area     | Height  | Area %  | Height % |
|-------|-----------|----------|---------|---------|----------|
| 1     | 18.091    | 17478381 | 532691  | 23.220  | 34.420   |
| 2     | 27.878    | 57794862 | 1014937 | 76.780  | 65.580   |
| Total |           | 75273242 | 1547627 | 100.000 | 100.000  |

**3h**

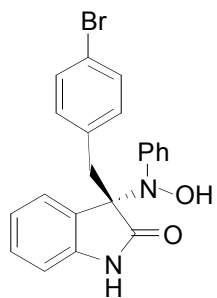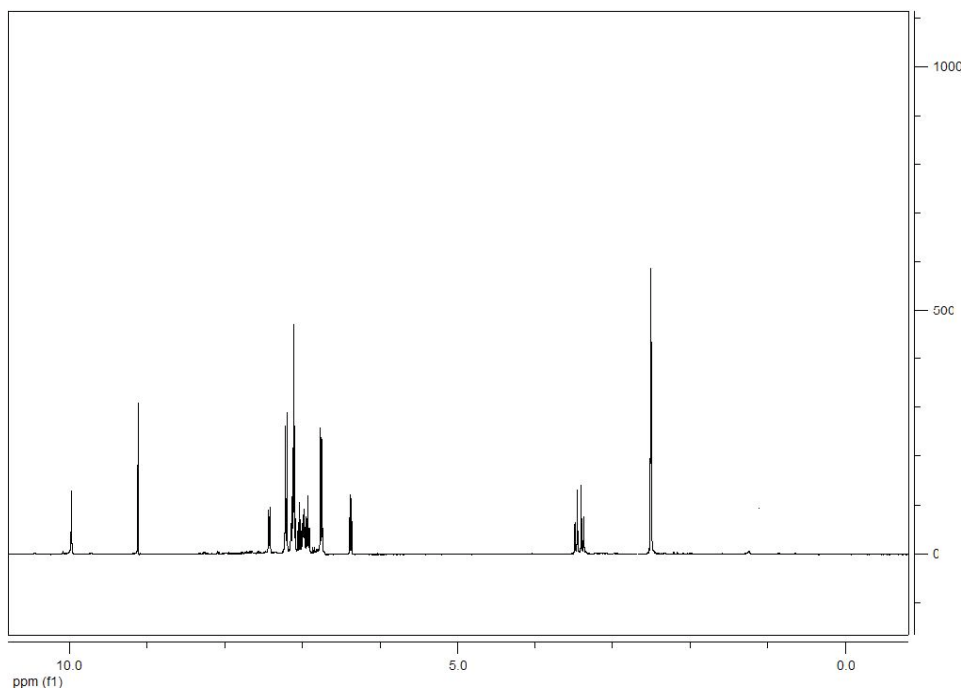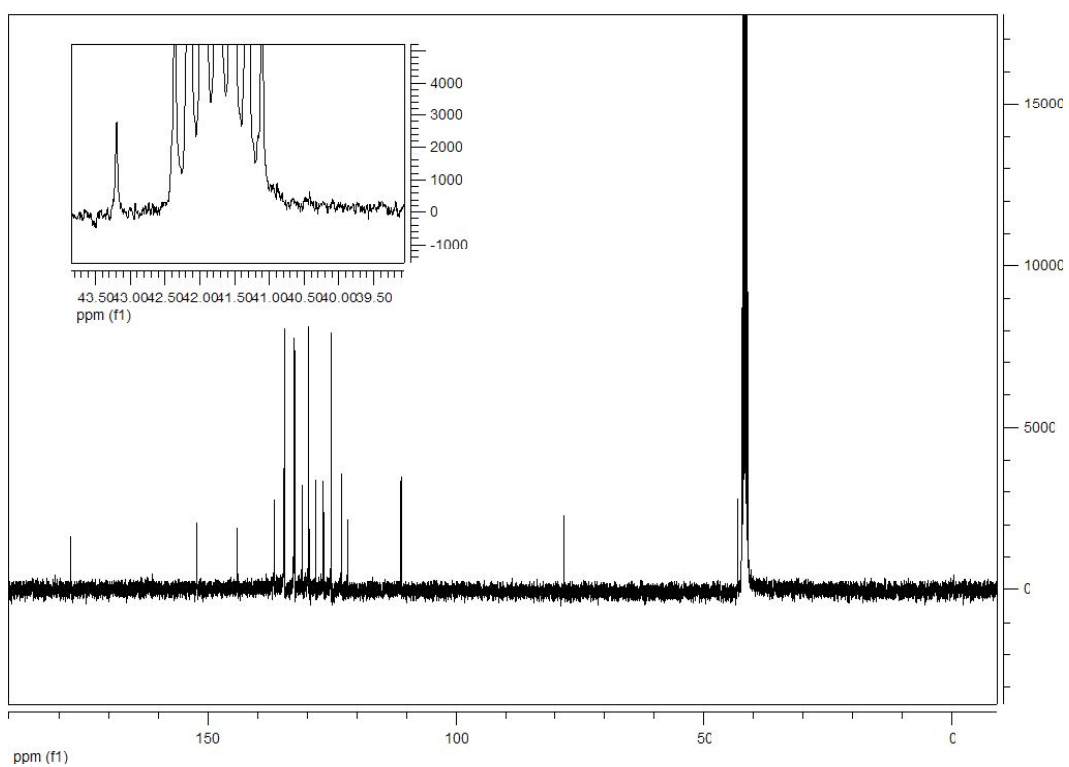

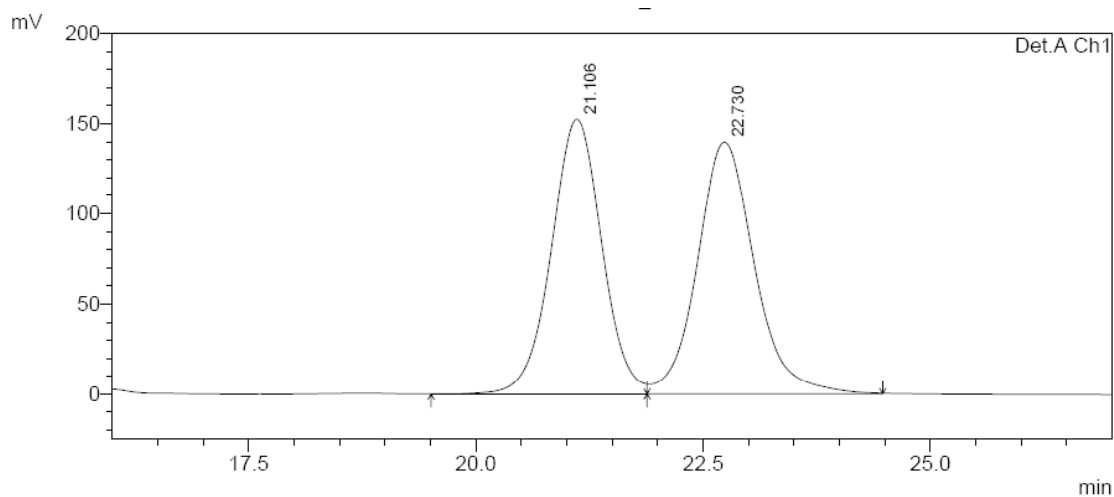

1 Det.A Ch1/254nm

PeakTable

Detector A Ch1 254nm

| Peak# | Ret. Time | Area     | Height | Area %  | Height % |
|-------|-----------|----------|--------|---------|----------|
| 1     | 21.106    | 5892841  | 152549 | 49.165  | 52.196   |
| 2     | 22.730    | 6092915  | 139712 | 50.835  | 47.804   |
| Total |           | 11985756 | 292260 | 100.000 | 100.000  |

(*S,S*)-TUC

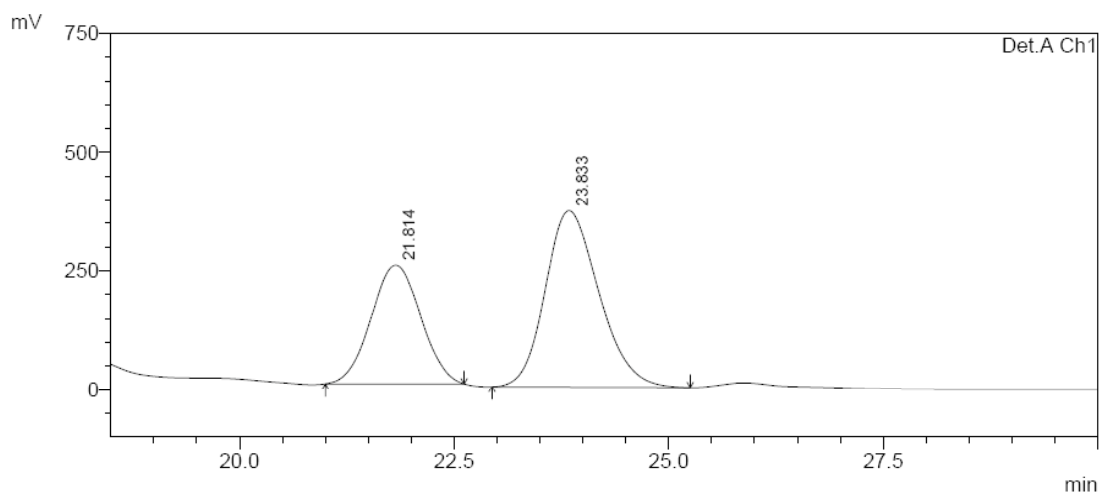

1 Det.A Ch1/254nm

PeakTable

Detector A Ch1 254nm

| Peak# | Ret. Time | Area     | Height | Area %  | Height % |
|-------|-----------|----------|--------|---------|----------|
| 1     | 21.814    | 10043421 | 249317 | 38.338  | 40.222   |
| 2     | 23.833    | 16153294 | 370534 | 61.662  | 59.778   |
| Total |           | 26196715 | 619851 | 100.000 | 100.000  |



(*S,S*)-TUC (with product filtration)

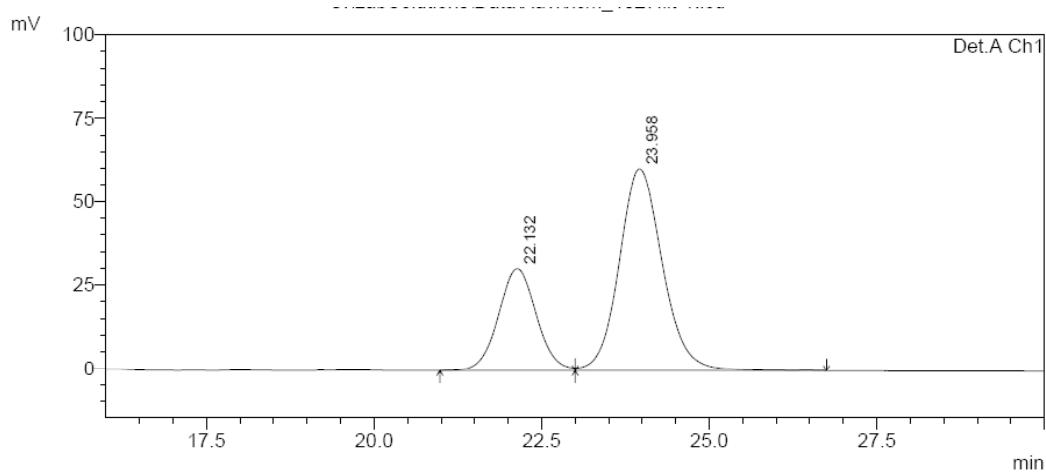

1 Det.A Ch1/254nm

PeakTable

Detector A Ch1 254nm

| Peak# | Ret. Time | Area    | Height | Area %  | Height % |
|-------|-----------|---------|--------|---------|----------|
| 1     | 22.132    | 1210786 | 30546  | 30.721  | 33.502   |
| 2     | 23.958    | 2730473 | 60630  | 69.279  | 66.498   |
| Total |           | 3941260 | 91176  | 100.000 | 100.000  |

**3i**

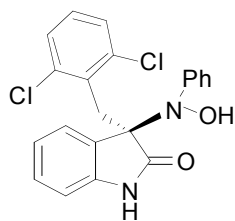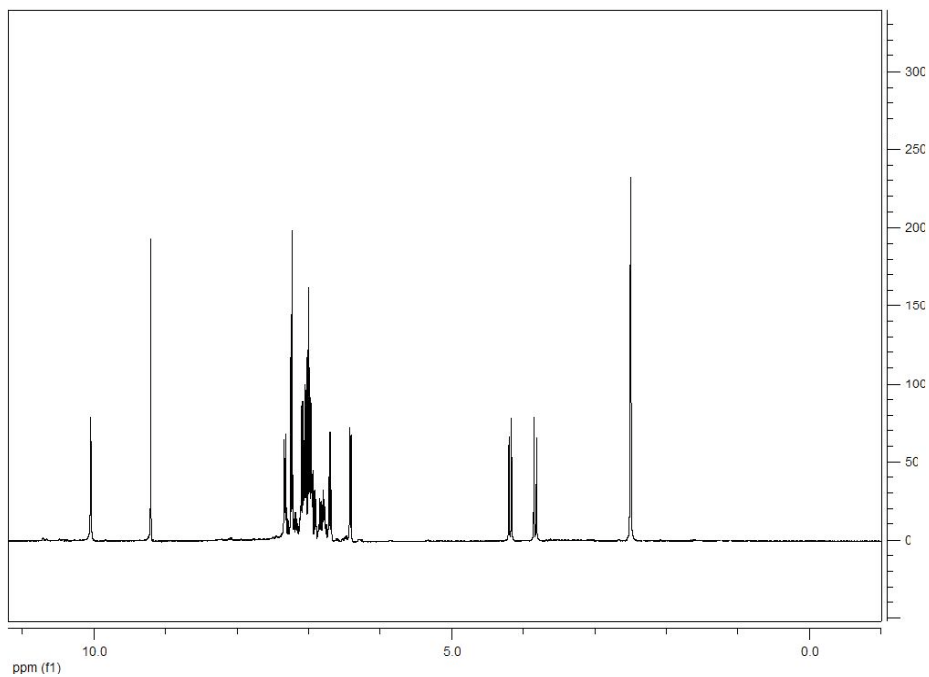

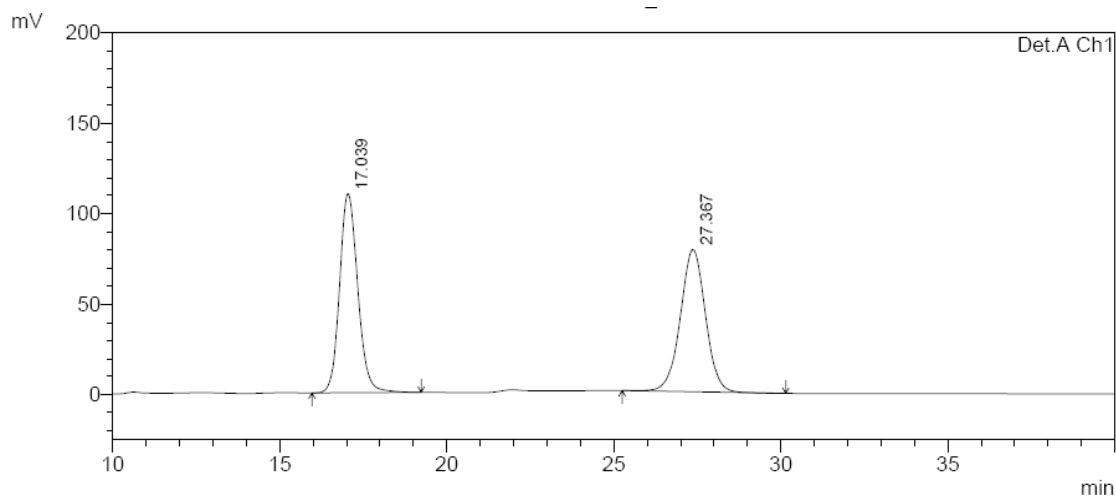

1 Det.A Ch1/254nm

PeakTable

Detector A Ch1 254nm

| Peak# | Ret. Time | Area    | Height | Area %  | Height % |
|-------|-----------|---------|--------|---------|----------|
| 1     | 17.039    | 4176468 | 110062 | 50.298  | 58.301   |
| 2     | 27.367    | 4127043 | 78722  | 49.702  | 41.699   |
| Total |           | 8303511 | 188784 | 100.000 | 100.000  |

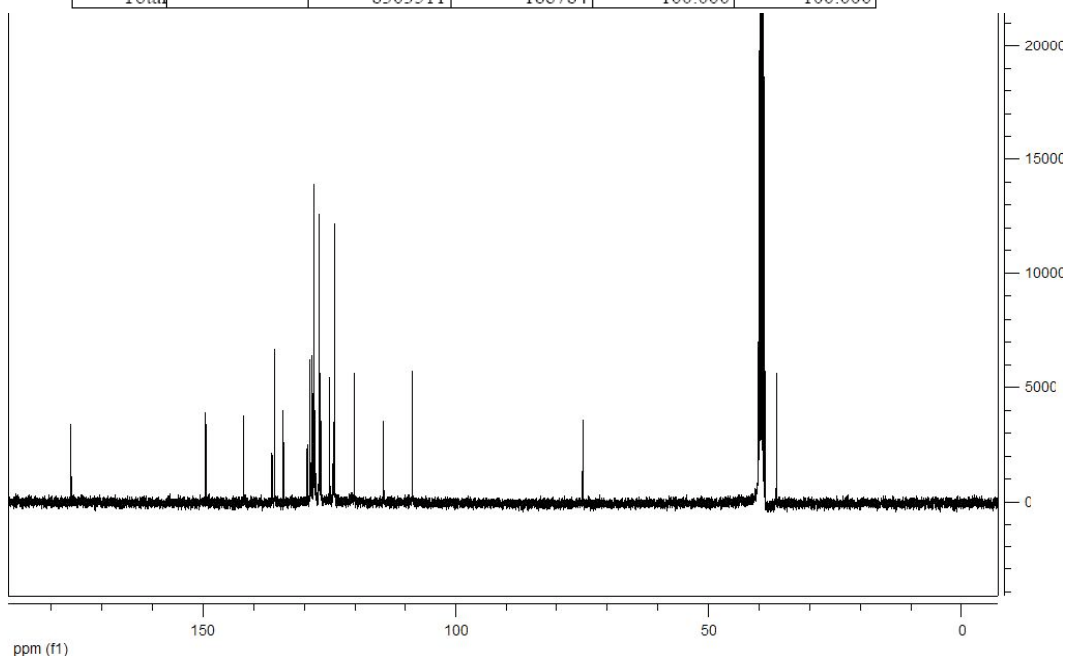

(*R,R*)-TUC

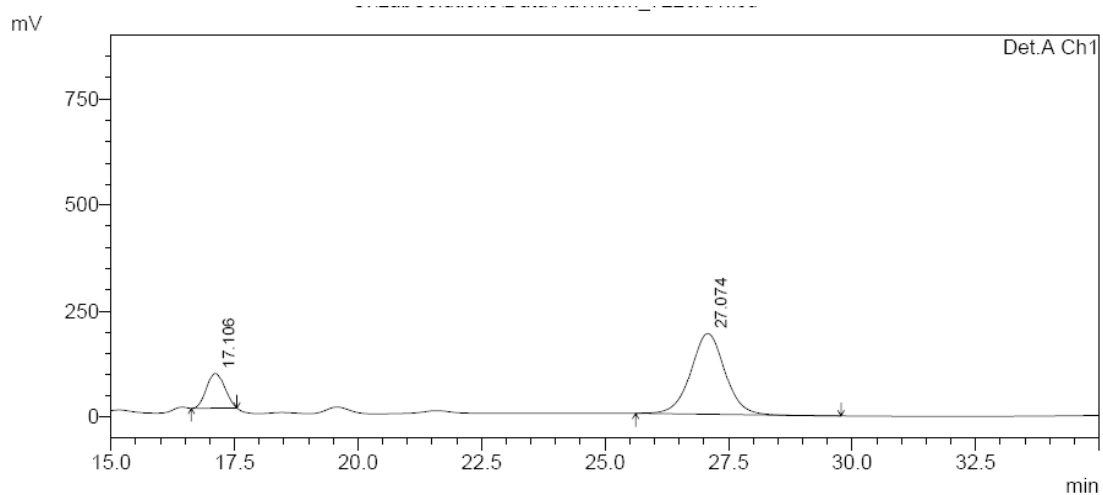

1 Det.A Ch1/254nm

PeakTable

Detector A Ch1 254nm

| Peak# | Ret. Time | Area     | Height | Area %  | Height % |
|-------|-----------|----------|--------|---------|----------|
| 1     | 17.106    | 2131600  | 83789  | 18.803  | 30.425   |
| 2     | 27.074    | 9204735  | 191608 | 81.197  | 69.575   |
| Total |           | 11336335 | 275397 | 100.000 | 100.000  |

(*R,R*)-TUC (with product filtration)

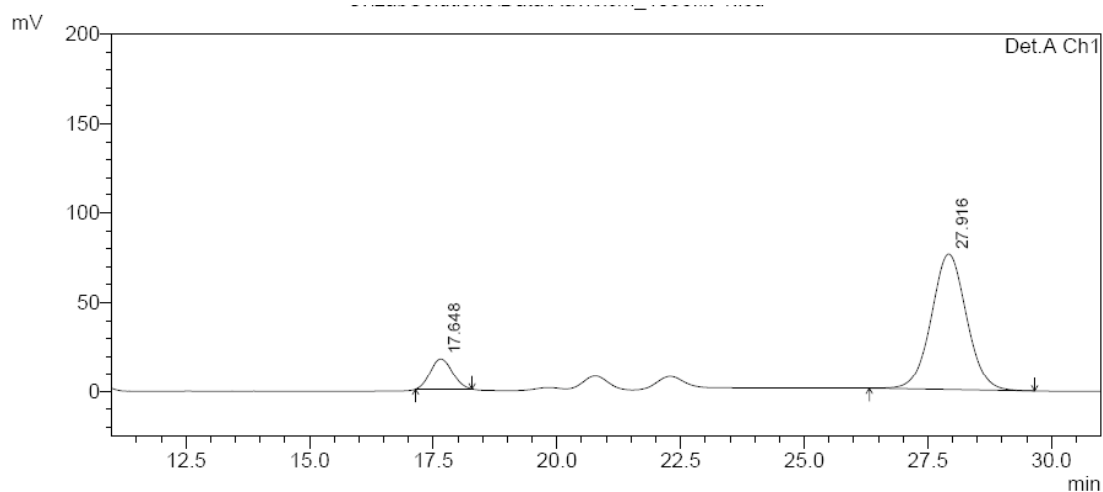

1 Det.A Ch1/254nm

PeakTable

Detector A Ch1 254nm

| Peak# | Ret. Time | Area    | Height | Area %  | Height % |
|-------|-----------|---------|--------|---------|----------|
| 1     | 17.648    | 535977  | 17239  | 12.426  | 18.513   |
| 2     | 27.916    | 3777434 | 75879  | 87.574  | 81.487   |
| Total |           | 4313411 | 93117  | 100.000 | 100.000  |
